# Supplementary material
Source: Royal Society of Chemistry journal article supplement (doi:10.1039/d6ce00065g)
Supplement: d6ce00065g1.pdf [file d6ce00065g1.pdf]

## Electronic Supplementary Information

### The impact of polymorphism on the thermophysical properties of Methyl Behenate as phase-change material

Rebecca Ravotti<sup>a,b</sup>, Xiaojiao Liu<sup>b</sup>, Colin R. Pulham<sup>b</sup>, and Anastasia Stamatiou<sup>a</sup>

\* rebecca.ravotti@hslu.ch

<sup>a</sup>. HSLU Lucerne University of Applied Sciences, Technikumstrasse 21, CH-6048 Horw, Switzerland

<sup>b</sup>. EaStChem, University of Edinburgh, School of Chemistry, David Brewster Rd., EH9 3FJ Edinburgh, United Kingdom

## 2. Materials and Methods

### 2.2 Differential Scanning Calorimetry (DSC)

To investigate the polymorphic behaviour of methyl behenate (MEBE) with different heating/cooling rates, the cycling regime shown in Figure A1 was employed. To summarise, samples of methyl behenate were cycled twice between 20–80°C at rates of 10, 1 and 0.1K/min. Isotherms of 5 minutes were inserted at the beginning and end of each heating/cooling cycle to allow for sample equilibration and temperature homogeneity.

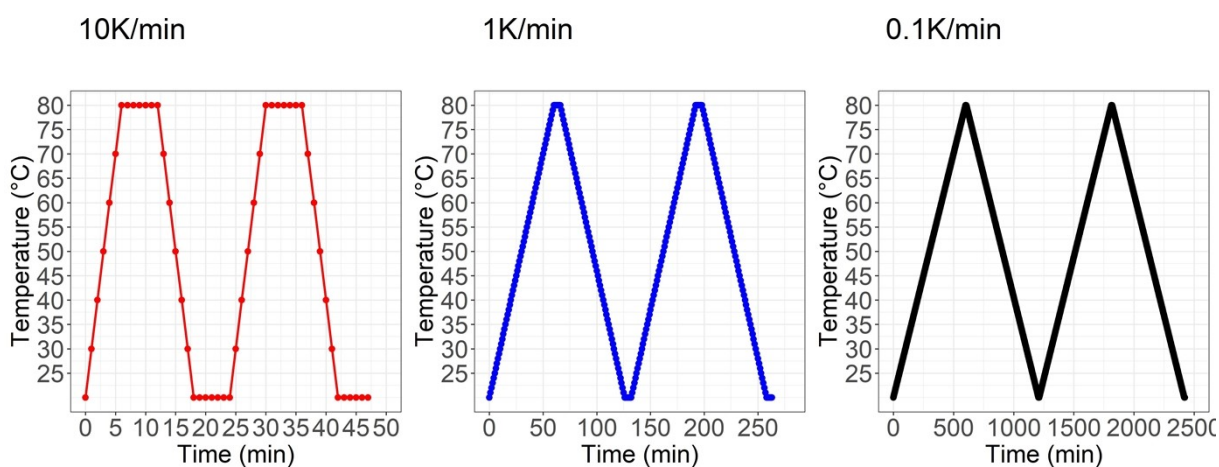

**Figure A1.** Heating and cooling regime used to explore thermal behaviour of MEBE.

### 2.3 Hot-Stage Microscopy (HSM)

A custom heating/cooling stage for a DinoLite microscope was built at HSLU to conduct in-situ hot-stage microscopy analysis. **Figure A2** shows the hot stage built according to Meerstetter Engineering's guidelines.

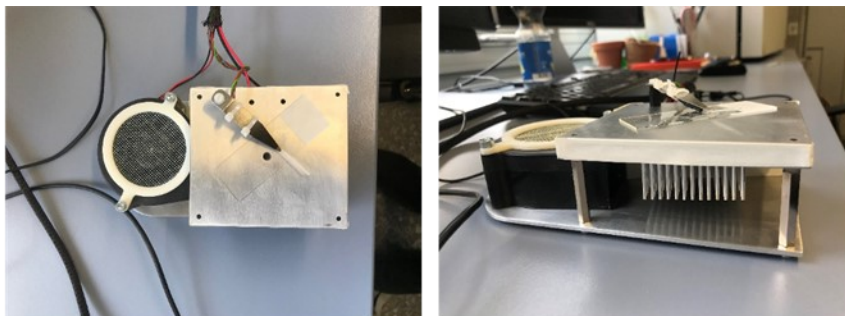

**Figure A2.** Custom hot-stage built at HSLU for HSM analysis

The instrument was calibrated with methyl palmitate from Merck (Gygli, CH). Details on the calibration results can be found in **Table S1**, showing a good degree of agreement between the two techniques.

**Table S1.** Calibration results of HSM with methyl palmitate and comparison with DSC data.

|                  | $T_{onset}$ [°C](DSC) |            | $T_o$ [°C](HSM) |            |
|------------------|-----------------------|------------|-----------------|------------|
|                  | Crystallisation       | Melting    | Crystallisation | Melting    |
| <b>10 K/min</b>  | 25.7 ± 0.1            | 26.7 ± 0.3 | 25.5 ± 0.5      | 27.0 ± 1.0 |
| <b>1 K/min</b>   | 26.3 ± 0.5            | 26.6 ± 1.2 | 25.5 ± 0.5      | 26.5 ± 0.5 |
| <b>0.1 K/min</b> | 26.3 ± 0.3            | 27.0 ± 0.1 | 25.0 ± 0.5      | 27.0 ± 1.0 |

#### 2.4.2 Growth of single crystals from solution

Single crystals of Form I of Methyl Behenate were successfully grown from solution by vapour diffusion using ethyl acetate as a solvent and methanol as an antisolvent. **Figure A3** shows the setup used to grow the crystals.

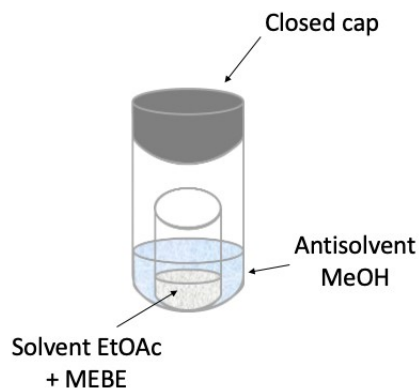

**Figure A3.** Solvent (Ethyl acetate, EtOAc)-antisolvent (methanol, MeOH) setup for growing single crystals of Form I.

### 3. Results

#### 3.2 X-Ray diffraction Investigation

##### 3.2.1 Form I

**Table S2** shows the complete list of bond lengths of Form I of methyl behenate.

**Table S2.** Interatomic distances of Form I of methyl behenate from single crystal XRD

| Atom 1 | Atom 2 | Length (Å) |
|--------|--------|------------|
| C17    | H17A   | 0.97       |
| C17    | H17B   | 0.97       |
| C17    | C16    | 1.53(1)    |
| C17    | C18    | 1.49(1)    |
| C15    | H15A   | 0.97       |
| C15    | H15B   | 0.97       |
| C15    | C16    | 1.53(1)    |
| C15    | C14    | 1.53(1)    |
| C11    | H11A   | 0.97       |
| C11    | H11B   | 0.97       |
| C11    | C12    | 1.52(1)    |
| C11    | C10    | 1.51(1)    |
| C13    | H13A   | 0.97       |
| C13    | H13B   | 0.969      |
| C13    | C14    | 1.53(1)    |
| C13    | C12    | 1.54(1)    |
| C16    | H16A   | 0.97       |
| C16    | H16B   | 0.97       |
| C5     | H5A    | 0.97       |
| C5     | H5B    | 0.97       |
| C5     | C6     | 1.53(1)    |
| C5     | C4     | 1.52(1)    |
| C21    | H21A   | 0.97       |
| C21    | H21B   | 0.97       |
| C21    | C22    | 1.51(1)    |
| C21    | C20    | 1.57(1)    |
| C19    | H19A   | 0.97       |
| C19    | H19B   | 0.97       |
| C19    | C18    | 1.55(1)    |
| C19    | C20    | 1.51(1)    |
| C7     | H7A    | 0.97       |
| C7     | H7B    | 0.97       |
| C7     | C6     | 1.50(1)    |
| C7     | C8     | 1.54(1)    |
| C3     | H3A    | 0.97       |
| C3     | H3B    | 0.97       |
| C3     | C4     | 1.53(1)    |
| C3     | C2     | 1.50(1)    |
| C14    | H14A   | 0.97       |
| C14    | H14B   | 0.97       |
| C23    | H23A   | 0.96       |
| C23    | H23B   | 0.96       |
| C23    | H23C   | 0.96       |
| C23    | C22    | 1.51(2)    |
| C22    | H22A   | 0.97       |

|      |      |         |
|------|------|---------|
| C22  | H22B | 0.97    |
| C12  | H12A | 0.97    |
| C12  | H12B | 0.97    |
| C18  | H18A | 0.97    |
| C18  | H18B | 0.97    |
| C6   | H6A  | 0.97    |
| C6   | H6B  | 0.97    |
| C10  | H10A | 0.97    |
| C10  | H10B | 0.97    |
| C10  | C9   | 1.53(1) |
| C9   | H9A  | 0.97    |
| C9   | H9B  | 0.97    |
| C9   | C8   | 1.52(1) |
| C4   | H4A  | 0.97    |
| C4   | H4B  | 0.97    |
| C8   | H8A  | 0.97    |
| C8   | H8B  | 0.97    |
| C20  | H20A | 0.97    |
| C20  | H20B | 0.97    |
| O2   | C2   | 1.14(1) |
| O1   | C2   | 1.37(1) |
| O1   | C1   | 1.47(1) |
| C1   | H1A  | 0.96    |
| C1   | H1B  | 0.96    |
| C1   | H1C  | 0.96    |
| C6A  | H6AA | 0.97    |
| C6A  | H6AB | 0.97    |
| C6A  | C7A  | 1.51(2) |
| C6A  | C5A  | 1.49(2) |
| C8A  | H8AA | 0.97    |
| C8A  | H8AB | 0.97    |
| C8A  | C9A  | 1.52(2) |
| C8A  | C7A  | 1.48(2) |
| C4A  | H4AA | 0.97    |
| C4A  | H4AB | 0.97    |
| C4A  | C3A  | 1.51(2) |
| C4A  | C5A  | 1.51(2) |
| C1A  | H1AA | 0.96    |
| C1A  | H1AB | 0.96    |
| C1A  | H1AC | 0.96    |
| C1A  | O1A  | 1.43(2) |
| O1A  | C2A  | 1.34(2) |
| C16A | H16C | 0.97    |
| C16A | H16D | 0.97    |
| C16A | C17A | 1.50(2) |
| C16A | C15A | 1.48(2) |
| C10A | H10C | 0.97    |
| C10A | H10D | 0.97    |
| C10A | C9A  | 1.49(2) |
| C10A | C11A | 1.53(2) |
| C2A  | C3A  | 1.43(2) |
| C2A  | O2A  | 1.22(2) |

|      |      |         |
|------|------|---------|
| C3A  | H3AA | 0.97    |
| C3A  | H3AB | 0.97    |
| C12A | H12C | 0.97    |
| C12A | H12D | 0.97    |
| C12A | C11A | 1.51(2) |
| C12A | C13A | 1.50(2) |
| C9A  | H9AA | 0.97    |
| C9A  | H9AB | 0.97    |
| C7A  | H7AA | 0.97    |
| C7A  | H7AB | 0.97    |
| C18A | H18C | 0.97    |
| C18A | H18D | 0.97    |
| C18A | C17A | 1.52(2) |
| C18A | C19A | 1.47(2) |
| C5A  | H5AA | 0.97    |
| C5A  | H5AB | 0.97    |
| C14A | H14C | 0.97    |
| C14A | H14D | 0.97    |
| C14A | C15A | 1.54(2) |
| C14A | C13A | 1.50(2) |
| C11A | H11C | 0.97    |
| C11A | H11D | 0.97    |
| C22A | H22C | 0.97    |
| C22A | H22D | 0.97    |
| C22A | C21A | 1.45(2) |
| C22A | C23A | 1.51(2) |
| C17A | H17C | 0.97    |
| C17A | H17D | 0.97    |
| C19A | H19C | 0.97    |
| C19A | H19D | 0.97    |
| C19A | C20A | 1.49(2) |
| C15A | H15C | 0.97    |
| C15A | H15D | 0.97    |
| C13A | H13C | 0.97    |
| C13A | H13D | 0.97    |
| C20A | H20C | 0.97    |
| C20A | H20D | 0.97    |
| C20A | C21A | 1.46(2) |
| C21A | H21C | 0.97    |
| C21A | H21D | 0.97    |
| C23A | H23D | 0.96    |
| C23A | H23E | 0.96    |
| C23A | H23F | 0.96    |

**Table S3** shows the complete list of bond angles of Form I of methyl behenate.

**Table S3.** Interatomic angles of Form I of methyl behenate from single crystal XRD

| Atom1 | Atom2 | Atom3 | Angle (°) |
|-------|-------|-------|-----------|
| H17A  | C17   | H17B  | 107.6     |
| H17A  | C17   | C16   | 108.7     |
| H17A  | C17   | C18   | 108.7     |
| H17B  | C17   | C16   | 108.6     |

|      |     |      |          |
|------|-----|------|----------|
| H17B | C17 | C18  | 108.7    |
| C16  | C17 | C18  | 114.3(6) |
| H15A | C15 | H15B | 107.7    |
| H15A | C15 | C16  | 108.9    |
| H15A | C15 | C14  | 108.9    |
| H15B | C15 | C16  | 108.9    |
| H15B | C15 | C14  | 108.9    |
| C16  | C15 | C14  | 113.3(6) |
| H11A | C11 | H11B | 107.7    |
| H11A | C11 | C12  | 108.9    |
| H11A | C11 | C10  | 108.8    |
| H11B | C11 | C12  | 108.9    |
| H11B | C11 | C10  | 108.9    |
| C12  | C11 | C10  | 113.5(6) |
| H13A | C13 | H13B | 107.8    |
| H13A | C13 | C14  | 108.9    |
| H13A | C13 | C12  | 108.9    |
| H13B | C13 | C14  | 108.9    |
| H13B | C13 | C12  | 109      |
| C14  | C13 | C12  | 113.2(6) |
| C17  | C16 | C15  | 114.8(6) |
| C17  | C16 | H16A | 108.5    |
| C17  | C16 | H16B | 108.5    |
| C15  | C16 | H16A | 108.6    |
| C15  | C16 | H16B | 108.6    |
| H16A | C16 | H16B | 107.5    |
| H5A  | C5  | H5B  | 107.8    |
| H5A  | C5  | C6   | 109      |
| H5A  | C5  | C4   | 108.9    |
| H5B  | C5  | C6   | 109      |
| H5B  | C5  | C4   | 108.9    |
| C6   | C5  | C4   | 113.1(6) |
| H21A | C21 | H21B | 108.1    |
| H21A | C21 | C22  | 109.5    |
| H21A | C21 | C20  | 109.5    |
| H21B | C21 | C22  | 109.4    |
| H21B | C21 | C20  | 109.5    |
| C22  | C21 | C20  | 110.8(8) |
| H19A | C19 | H19B | 107.8    |
| H19A | C19 | C18  | 109.1    |
| H19A | C19 | C20  | 109.1    |
| H19B | C19 | C18  | 109      |
| H19B | C19 | C20  | 109.1    |
| C18  | C19 | C20  | 112.7(7) |
| H7A  | C7  | H7B  | 107.7    |
| H7A  | C7  | C6   | 108.9    |
| H7A  | C7  | C8   | 108.9    |
| H7B  | C7  | C6   | 108.9    |
| H7B  | C7  | C8   | 108.9    |
| C6   | C7  | C8   | 113.4(6) |
| H3A  | C3  | H3B  | 107.8    |
| H3A  | C3  | C4   | 109.1    |

|      |     |      |          |
|------|-----|------|----------|
| H3A  | C3  | C2   | 109.1    |
| H3B  | C3  | C4   | 109.1    |
| H3B  | C3  | C2   | 109.1    |
| C4   | C3  | C2   | 112.5(7) |
| C15  | C14 | C13  | 112.6(6) |
| C15  | C14 | H14A | 109.1    |
| C15  | C14 | H14B | 109.1    |
| C13  | C14 | H14A | 109.1    |
| C13  | C14 | H14B | 109.1    |
| H14A | C14 | H14B | 107.8    |
| H23A | C23 | H23B | 109      |
| H23A | C23 | H23C | 109      |
| H23A | C23 | C22  | 109      |
| H23B | C23 | H23C | 109      |
| H23B | C23 | C22  | 110      |
| H23C | C23 | C22  | 110      |
| C21  | C22 | C23  | 112.0(9) |
| C21  | C22 | H22A | 109      |
| C21  | C22 | H22B | 109      |
| C23  | C22 | H22A | 109      |
| C23  | C22 | H22B | 109      |
| H22A | C22 | H22B | 108      |
| C11  | C12 | C13  | 113.5(6) |
| C11  | C12 | H12A | 108.9    |
| C11  | C12 | H12B | 108.9    |
| C13  | C12 | H12A | 108.9    |
| C13  | C12 | H12B | 108.8    |
| H12A | C12 | H12B | 107.7    |
| C17  | C18 | C19  | 114.3(7) |
| C17  | C18 | H18A | 108.7    |
| C17  | C18 | H18B | 108.7    |
| C19  | C18 | H18A | 108.6    |
| C19  | C18 | H18B | 108.7    |
| H18A | C18 | H18B | 107.6    |
| C5   | C6  | C7   | 113.4(6) |
| C5   | C6  | H6A  | 108.9    |
| C5   | C6  | H6B  | 108.9    |
| C7   | C6  | H6A  | 108.9    |
| C7   | C6  | H6B  | 108.9    |
| H6A  | C6  | H6B  | 107.7    |
| C11  | C10 | H10A | 108.8    |
| C11  | C10 | H10B | 108.7    |
| C11  | C10 | C9   | 114.0(6) |
| H10A | C10 | H10B | 107.7    |
| H10A | C10 | C9   | 108.8    |
| H10B | C10 | C9   | 108.8    |
| C10  | C9  | H9A  | 108.8    |
| C10  | C9  | H9B  | 108.8    |
| C10  | C9  | C8   | 113.6(6) |
| H9A  | C9  | H9B  | 107.7    |
| H9A  | C9  | C8   | 108.9    |
| H9B  | C9  | C8   | 108.9    |

|      |     |      |          |
|------|-----|------|----------|
| C5   | C4  | C3   | 109.7(6) |
| C5   | C4  | H4A  | 109.7    |
| C5   | C4  | H4B  | 109.7    |
| C3   | C4  | H4A  | 109.7    |
| C3   | C4  | H4B  | 109.8    |
| H4A  | C4  | H4B  | 108.2    |
| C7   | C8  | C9   | 112.9(6) |
| C7   | C8  | H8A  | 109      |
| C7   | C8  | H8B  | 109      |
| C9   | C8  | H8A  | 109      |
| C9   | C8  | H8B  | 109      |
| H8A  | C8  | H8B  | 107.8    |
| C21  | C20 | C19  | 111.8(7) |
| C21  | C20 | H20A | 109.3    |
| C21  | C20 | H20B | 109.3    |
| C19  | C20 | H20A | 109.3    |
| C19  | C20 | H20B | 109.2    |
| H20A | C20 | H20B | 107.9    |
| C2   | O1  | C1   | 112.7(9) |
| C3   | C2  | O2   | 124.2(9) |
| C3   | C2  | O1   | 112.5(8) |
| O2   | C2  | O1   | 120(1)   |
| O1   | C1  | H1A  | 110      |
| O1   | C1  | H1B  | 110      |
| O1   | C1  | H1C  | 109      |
| H1A  | C1  | H1B  | 110      |
| H1A  | C1  | H1C  | 109      |
| H1B  | C1  | H1C  | 109      |
| H6AA | C6A | H6AB | 107      |
| H6AA | C6A | C7A  | 108      |
| H6AA | C6A | C5A  | 108      |
| H6AB | C6A | C7A  | 108      |
| H6AB | C6A | C5A  | 108      |
| C7A  | C6A | C5A  | 116(1)   |
| H8AA | C8A | H8AB | 107      |
| H8AA | C8A | C9A  | 108      |
| H8AA | C8A | C7A  | 108      |
| H8AB | C8A | C9A  | 108      |
| H8AB | C8A | C7A  | 108      |
| C9A  | C8A | C7A  | 115(1)   |
| H4AA | C4A | H4AB | 107      |
| H4AA | C4A | C3A  | 108      |
| H4AA | C4A | C5A  | 108.2    |
| H4AB | C4A | C3A  | 108      |
| H4AB | C4A | C5A  | 108.2    |
| C3A  | C4A | C5A  | 116.4(9) |
| H1AA | C1A | H1AB | 110      |
| H1AA | C1A | H1AC | 110      |
| H1AA | C1A | O1A  | 110      |
| H1AB | C1A | H1AC | 109      |
| H1AB | C1A | O1A  | 109      |
| H1AC | C1A | O1A  | 109      |

|      |      |      |          |
|------|------|------|----------|
| C1A  | O1A  | C2A  | 120(1)   |
| H16C | C16A | H16D | 108      |
| H16C | C16A | C17A | 109      |
| H16C | C16A | C15A | 109      |
| H16D | C16A | C17A | 108      |
| H16D | C16A | C15A | 109      |
| C17A | C16A | C15A | 115(1)   |
| H10C | C10A | H10D | 108      |
| H10C | C10A | C9A  | 109      |
| H10C | C10A | C11A | 109      |
| H10D | C10A | C9A  | 109      |
| H10D | C10A | C11A | 109      |
| C9A  | C10A | C11A | 114(1)   |
| O1A  | C2A  | C3A  | 117(1)   |
| O1A  | C2A  | O2A  | 112(1)   |
| C3A  | C2A  | O2A  | 131(1)   |
| C4A  | C3A  | C2A  | 117(1)   |
| C4A  | C3A  | H3AA | 108      |
| C4A  | C3A  | H3AB | 108      |
| C2A  | C3A  | H3AA | 108      |
| C2A  | C3A  | H3AB | 108      |
| H3AA | C3A  | H3AB | 107      |
| H12C | C12A | H12D | 107      |
| H12C | C12A | C11A | 108      |
| H12C | C12A | C13A | 108      |
| H12D | C12A | C11A | 108      |
| H12D | C12A | C13A | 108      |
| C11A | C12A | C13A | 116(1)   |
| C8A  | C9A  | C10A | 114.2(9) |
| C8A  | C9A  | H9AA | 109      |
| C8A  | C9A  | H9AB | 109      |
| C10A | C9A  | H9AA | 109      |
| C10A | C9A  | H9AB | 109      |
| H9AA | C9A  | H9AB | 108      |
| C6A  | C7A  | C8A  | 117(1)   |
| C6A  | C7A  | H7AA | 108      |
| C6A  | C7A  | H7AB | 108      |
| C8A  | C7A  | H7AA | 108      |
| C8A  | C7A  | H7AB | 108      |
| H7AA | C7A  | H7AB | 107      |
| H18C | C18A | H18D | 107      |
| H18C | C18A | C17A | 108      |
| H18C | C18A | C19A | 108      |
| H18D | C18A | C17A | 108      |
| H18D | C18A | C19A | 108      |
| C17A | C18A | C19A | 117(1)   |
| C6A  | C5A  | C4A  | 116.1(9) |
| C6A  | C5A  | H5AA | 108      |
| C6A  | C5A  | H5AB | 108      |
| C4A  | C5A  | H5AA | 108.3    |
| C4A  | C5A  | H5AB | 108.3    |
| H5AA | C5A  | H5AB | 107      |

|      |      |      |        |
|------|------|------|--------|
| H14C | C14A | H14D | 108    |
| H14C | C14A | C15A | 108    |
| H14C | C14A | C13A | 108    |
| H14D | C14A | C15A | 108    |
| H14D | C14A | C13A | 108    |
| C15A | C14A | C13A | 116(1) |
| C10A | C11A | C12A | 115(1) |
| C10A | C11A | H11C | 108    |
| C10A | C11A | H11D | 108    |
| C12A | C11A | H11C | 108    |
| C12A | C11A | H11D | 109    |
| H11C | C11A | H11D | 108    |
| H22C | C22A | H22D | 108    |
| H22C | C22A | C21A | 109    |
| H22C | C22A | C23A | 108    |
| H22D | C22A | C21A | 109    |
| H22D | C22A | C23A | 109    |
| C21A | C22A | C23A | 115(1) |
| C16A | C17A | C18A | 116(1) |
| C16A | C17A | H17C | 108    |
| C16A | C17A | H17D | 108    |
| C18A | C17A | H17C | 108    |
| C18A | C17A | H17D | 108    |
| H17C | C17A | H17D | 108    |
| C18A | C19A | H19C | 107    |
| C18A | C19A | H19D | 107    |
| C18A | C19A | C20A | 121(1) |
| H19C | C19A | H19D | 107    |
| H19C | C19A | C20A | 107    |
| H19D | C19A | C20A | 107    |
| C16A | C15A | C14A | 115(1) |
| C16A | C15A | H15C | 109    |
| C16A | C15A | H15D | 109    |
| C14A | C15A | H15C | 109    |
| C14A | C15A | H15D | 109    |
| H15C | C15A | H15D | 108    |
| C12A | C13A | C14A | 116(1) |
| C12A | C13A | H13C | 108    |
| C12A | C13A | H13D | 108    |
| C14A | C13A | H13C | 108    |
| C14A | C13A | H13D | 108    |
| H13C | C13A | H13D | 107    |
| C19A | C20A | H20C | 107    |
| C19A | C20A | H20D | 107    |
| C19A | C20A | C21A | 120(1) |
| H20C | C20A | H20D | 107    |
| H20C | C20A | C21A | 107    |
| H20D | C20A | C21A | 107    |
| C22A | C21A | C20A | 111(1) |
| C22A | C21A | H21C | 110    |
| C22A | C21A | H21D | 109    |
| C20A | C21A | H21C | 109    |

|      |      |      |     |
|------|------|------|-----|
| C20A | C21A | H21D | 110 |
| H21C | C21A | H21D | 108 |
| C22A | C23A | H23D | 109 |
| C22A | C23A | H23E | 109 |
| C22A | C23A | H23F | 110 |
| H23D | C23A | H23E | 109 |
| H23D | C23A | H23F | 110 |
| H23E | C23A | H23F | 109 |

### 3.2.2 Form III

**Table S4** shows the complete list of bond lengths of Form III of methyl behenate.

**Table S4.** Interatomic distances of Form III of methyl behenate from single crystal XRD

| Atom1 | Atom2 | Length (Å) |
|-------|-------|------------|
| C001  | H00A  | 0.97       |
| C001  | H00B  | 0.97       |
| C001  | C003  | 1.524(2)   |
| C001  | C005  | 1.519(1)   |
| C002  | H00C  | 0.97       |
| C002  | H00D  | 0.97       |
| C002  | C004  | 1.521(2)   |
| C002  | C00A  | 1.521(2)   |
| C003  | H00E  | 0.97       |
| C003  | H00F  | 0.97       |
| C003  | C006  | 1.521(1)   |
| C004  | H00G  | 0.97       |
| C004  | H00H  | 0.97       |
| C004  | C008  | 1.523(1)   |
| C005  | H00I  | 0.97       |
| C005  | H00J  | 0.97       |
| C006  | H00K  | 0.97       |
| C006  | H00L  | 0.97       |
| C006  | C008  | 1.522(2)   |
| C007  | H00M  | 0.97       |
| C007  | H00N  | 0.97       |
| C007  | C00A  | 1.518(2)   |
| C007  | C00B  | 1.505(2)   |
| C008  | H00O  | 0.97       |
| C008  | H00P  | 0.97       |
| O009  | C00B  | 1.429(2)   |
| O009  | C00D  | 1.488(2)   |
| C00A  | H00Q  | 0.97       |
| C00A  | H00R  | 0.97       |
| C00B  | O00C  | 1.126(3)   |
| C00D  | H00U  | 0.96       |
| C00D  | H00V  | 0.96       |
| C00D  | H00W  | 0.96       |

**Table S5** shows the complete list of bond angles of Form III of methyl behenate.

**Table S5.** Interatomic angles of Form III of methyl behenate from single crystal XRD

| <b>Atom1</b> | <b>Atom2</b> | <b>Atom3</b> | <b>Angle (°)</b> |
|--------------|--------------|--------------|------------------|
| H00A         | C001         | H00B         | 107.7            |
| H00A         | C001         | C003         | 108.8            |
| H00A         | C001         | C005         | 108.8            |
| H00B         | C001         | C003         | 108.8            |
| H00B         | C001         | C005         | 108.8            |
| C003         | C001         | C005         | 113.69(9)        |
| H00C         | C002         | H00D         | 107.7            |
| H00C         | C002         | C004         | 108.8            |
| H00C         | C002         | C00A         | 108.8            |
| H00D         | C002         | C004         | 108.8            |
| H00D         | C002         | C00A         | 108.8            |
| C004         | C002         | C00A         | 113.83(9)        |
| C001         | C003         | H00E         | 108.8            |
| C001         | C003         | H00F         | 108.8            |
| C001         | C003         | C006         | 113.83(9)        |
| H00E         | C003         | H00F         | 107.7            |
| H00E         | C003         | C006         | 108.8            |
| H00F         | C003         | C006         | 108.8            |
| C002         | C004         | H00G         | 108.9            |
| C002         | C004         | H00H         | 108.9            |
| C002         | C004         | C008         | 113.42(9)        |
| H00G         | C004         | H00H         | 107.7            |
| H00G         | C004         | C008         | 108.9            |
| H00H         | C004         | C008         | 108.9            |
| C001         | C005         | H00I         | 108.8            |
| C001         | C005         | H00J         | 108.8            |
| C001         | C005         | C005         | 113.77(9)        |
| H00I         | C005         | H00J         | 107.7            |
| H00I         | C005         | C005         | 108.8            |
| H00J         | C005         | C005         | 108.8            |
| C003         | C006         | H00K         | 108.8            |
| C003         | C006         | H00L         | 108.8            |
| C003         | C006         | C008         | 113.62(9)        |
| H00K         | C006         | H00L         | 107.7            |
| H00K         | C006         | C008         | 108.8            |
| H00L         | C006         | C008         | 108.9            |
| H00M         | C007         | H00N         | 107.6            |
| H00M         | C007         | C00A         | 108.7            |
| H00M         | C007         | C00B         | 108.7            |
| H00N         | C007         | C00A         | 108.7            |
| H00N         | C007         | C00B         | 108.7            |
| C00A         | C007         | C00B         | 114.1(1)         |
| C004         | C008         | C006         | 113.95(9)        |
| C004         | C008         | H00O         | 108.8            |
| C004         | C008         | H00P         | 108.8            |
| C006         | C008         | H00O         | 108.8            |
| C006         | C008         | H00P         | 108.8            |
| H00O         | C008         | H00P         | 107.6            |
| C00B         | O009         | C00D         | 114.2(1)         |
| C002         | C00A         | C007         | 112.84(9)        |

|      |      |      |           |
|------|------|------|-----------|
| C002 | C00A | H00Q | 109       |
| C002 | C00A | H00R | 109       |
| C007 | C00A | H00Q | 109       |
| C007 | C00A | H00R | 109       |
| H00Q | C00A | H00R | 107.8     |
| C007 | C00B | O009 | 112.7(1)  |
| C007 | C00B | O00C | 129.5(1)  |
| O009 | C00B | O00C | 115.6(1)  |
| O009 | C00D | H00U | 109.5     |
| O009 | C00D | H00V | 109.5     |
| O009 | C00D | H00W | 109.5     |
| H00U | C00D | H00V | 109.5     |
| H00U | C00D | H00W | 109.5     |
| H00V | C00D | H00W | 109.5     |
| H00A | C001 | H00B | 107.7     |
| H00A | C001 | C003 | 108.8     |
| H00A | C001 | C005 | 108.8     |
| H00B | C001 | C003 | 108.8     |
| H00B | C001 | C005 | 108.8     |
| C003 | C001 | C005 | 113.69(9) |
| H00C | C002 | H00D | 107.7     |
| H00C | C002 | C004 | 108.8     |
| H00C | C002 | C00A | 108.8     |
| H00D | C002 | C004 | 108.8     |
| H00D | C002 | C00A | 108.8     |
| C004 | C002 | C00A | 113.83(9) |
| C001 | C003 | H00E | 108.8     |
| C001 | C003 | H00F | 108.8     |
| C001 | C003 | C006 | 113.83(9) |
| H00E | C003 | H00F | 107.7     |
| H00E | C003 | C006 | 108.8     |
| H00F | C003 | C006 | 108.8     |
| C002 | C004 | H00G | 108.9     |
| C002 | C004 | H00H | 108.9     |
| C002 | C004 | C008 | 113.42(9) |
| H00G | C004 | H00H | 107.7     |
| H00G | C004 | C008 | 108.9     |
| H00H | C004 | C008 | 108.9     |
| C005 | C005 | C001 | 113.77(9) |
| C005 | C005 | H00I | 108.8     |
| C005 | C005 | H00J | 108.8     |
| C001 | C005 | H00I | 108.8     |
| C001 | C005 | H00J | 108.8     |
| H00I | C005 | H00J | 107.7     |
| C003 | C006 | H00K | 108.8     |
| C003 | C006 | H00L | 108.8     |
| C003 | C006 | C008 | 113.62(9) |
| H00K | C006 | H00L | 107.7     |
| H00K | C006 | C008 | 108.8     |
| H00L | C006 | C008 | 108.9     |
| H00M | C007 | H00N | 107.6     |
| H00M | C007 | C00A | 108.7     |

|      |      |      |           |
|------|------|------|-----------|
| H00M | C007 | C00B | 108.7     |
| H00N | C007 | C00A | 108.7     |
| H00N | C007 | C00B | 108.7     |
| C00A | C007 | C00B | 114.1(1)  |
| C004 | C008 | C006 | 113.95(9) |
| C004 | C008 | H00O | 108.8     |
| C004 | C008 | H00P | 108.8     |
| C006 | C008 | H00O | 108.8     |
| C006 | C008 | H00P | 108.8     |
| H00O | C008 | H00P | 107.6     |
| C00B | O009 | C00D | 114.2(1)  |
| C002 | C00A | C007 | 112.84(9) |
| C002 | C00A | H00Q | 109       |
| C002 | C00A | H00R | 109       |
| C007 | C00A | H00Q | 109       |
| C007 | C00A | H00R | 109       |
| H00Q | C00A | H00R | 107.8     |
| C007 | C00B | O009 | 112.7(1)  |
| C007 | C00B | O00C | 129.5(1)  |
| O009 | C00B | O00C | 115.6(1)  |
| O009 | C00D | H00U | 109.5     |
| O009 | C00D | H00V | 109.5     |
| O009 | C00D | H00W | 109.5     |
| H00U | C00D | H00V | 109.5     |
| H00U | C00D | H00W | 109.5     |
| H00V | C00D | H00W | 109.5     |

### 3.3 Synchrotron Powder X-Ray Diffraction studies

Powder patterns of methyl behenate were recorded *in-situ* at the I11 beamline in Diamond Light Source while performing heating/cooling cycles at 1K/min.

**Figure A4** shows the patterns recorded during the first heating cycle from room temperature (circa 24°C) to 70°C at rates of 1K/min. Minor shifts to lower  $2\theta$  associated to thermal expansion were visible, but no phase transitions were observed up to the onset of melting ( $\sim 56^\circ\text{C}$ ). The sample was completely molten by  $\sim 59^\circ\text{C}$

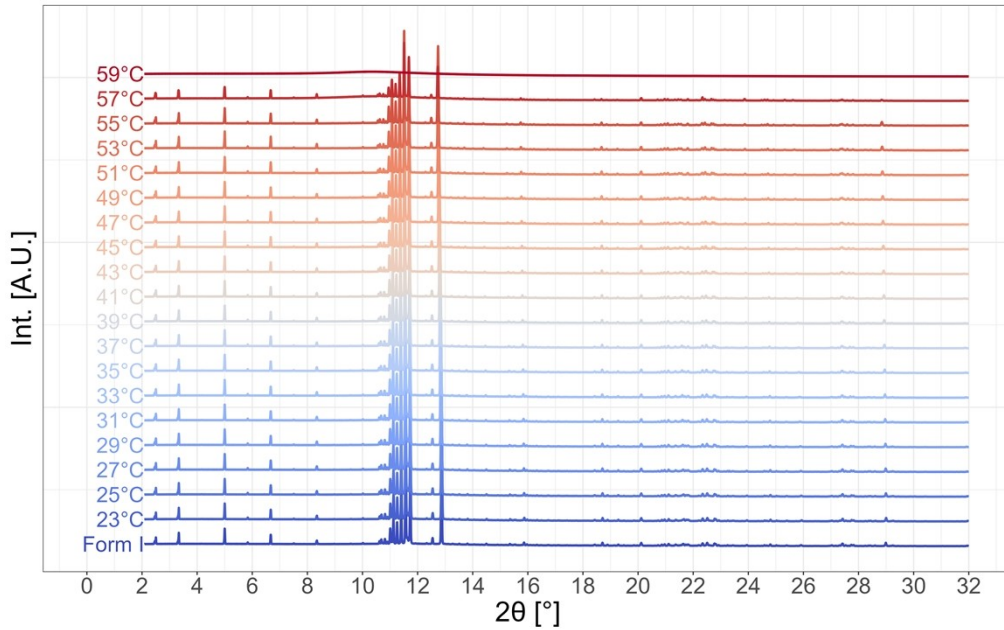

**Figure A4.** Powder pattern of MEBE recorded in-situ at I11 during the first heating cycle at 1K/min. The curves are colour coded based on the temperatures (blue: colder, red: hotter) and the labels indicate the temperature [°C] at which the pattern was recorded. Int. on the y-axis stands for intensity.

**Figure A5** shows the patterns recorded during the first cooling cycle from 70°C to room temperature (24°C) at rates of 1K/min. The onset of crystallisation was observed at ~ 49°C analogous to the onset of crystallisation observed in the DSC experiment, and was complete by 45°C. No distinct peaks from Form II were observed, while a powder pattern consistent with that of Form III was visible at room temperature. In the plot, the powder pattern of Form I is shown to allow a comparison with the pattern of Form III, observed at room temperature.

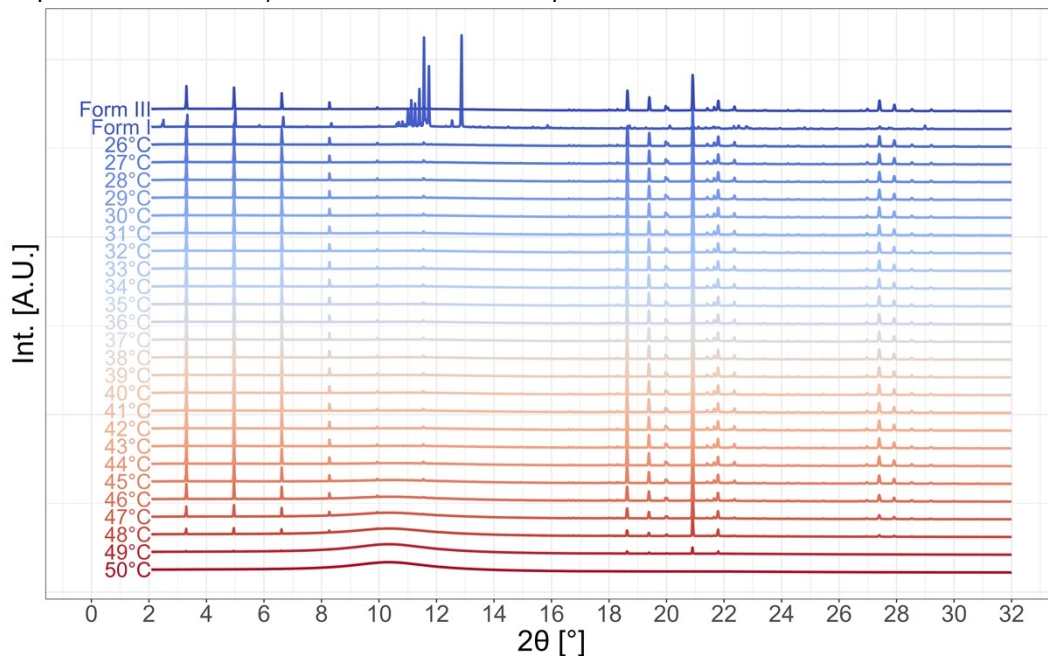

**Figure A5.** Powder pattern of MEBE recorded in-situ at I11 during the first cooling cycle at 1K/min. The curves are colour coded based on the temperatures (blue: colder, red: hotter) and the labels indicate the temperature [°C] at which the pattern was recorded. Int. on the y-axis stands for intensity.

**Figure A6** shows the patterns recorded during the second heating cycle from room temperature (circa 24°C) to 70°C at rates of 1K/min. The onset of melting was observed at ~ 52°C analogous to the onset of melting observed in the DSC experiment, and was complete by 57°C. In the plot, the powder pattern of Form I is shown to allow a comparison with the pattern of Form III, observed at room temperature.

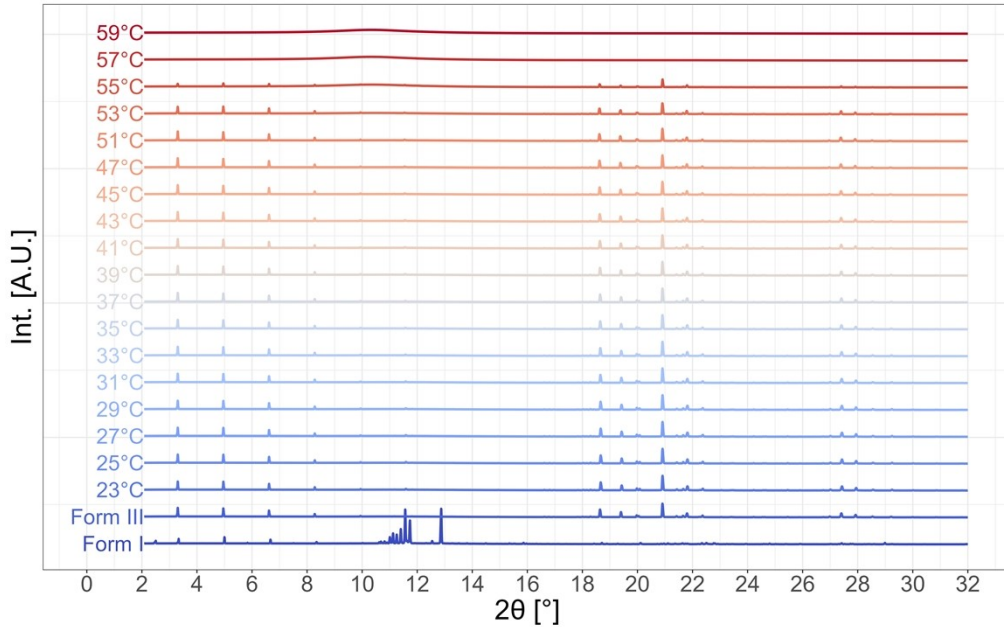

**Figure A6.** Powder pattern of MEBE recorded in-situ at I11 during the second heating cycle at 1K/min. The curves are colour coded based on the temperatures (blue: colder, red: hotter) and the labels indicate the temperature [°C] at which the pattern was recorded. Int. on the y-axis stands for intensity.
