# Supplementary material
Source: Royal Society of Chemistry journal article supplement (doi:10.1039/d6ce00065g)

10K/min

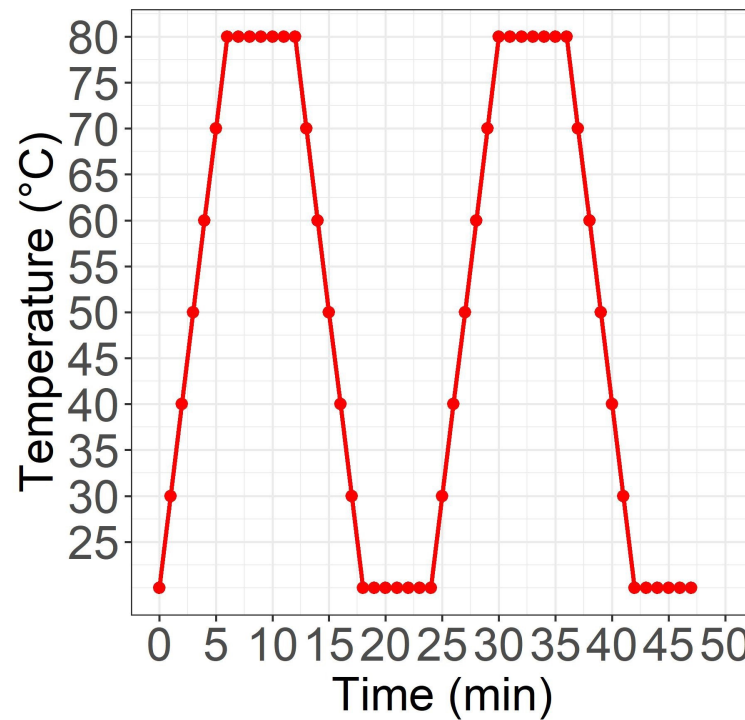

1K/min

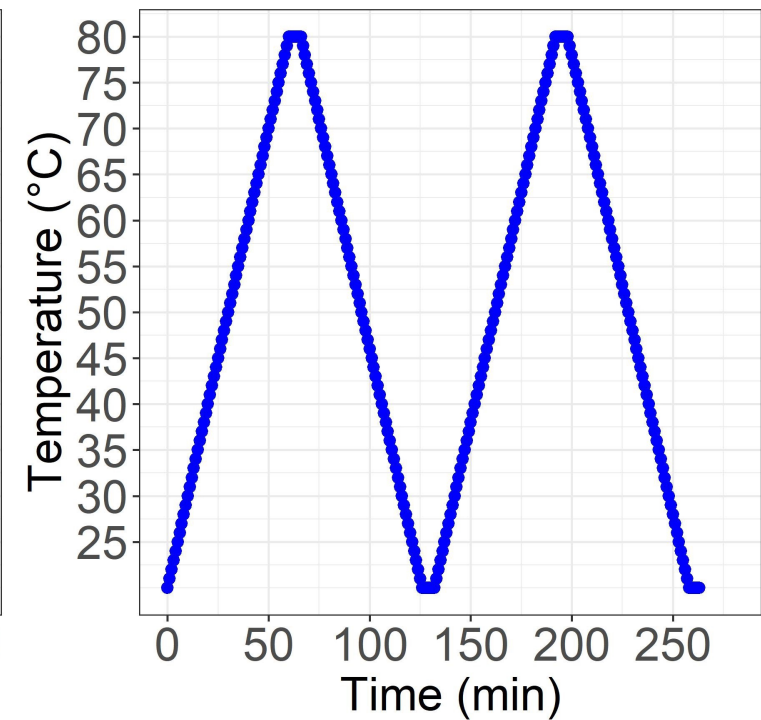

0.1K/min

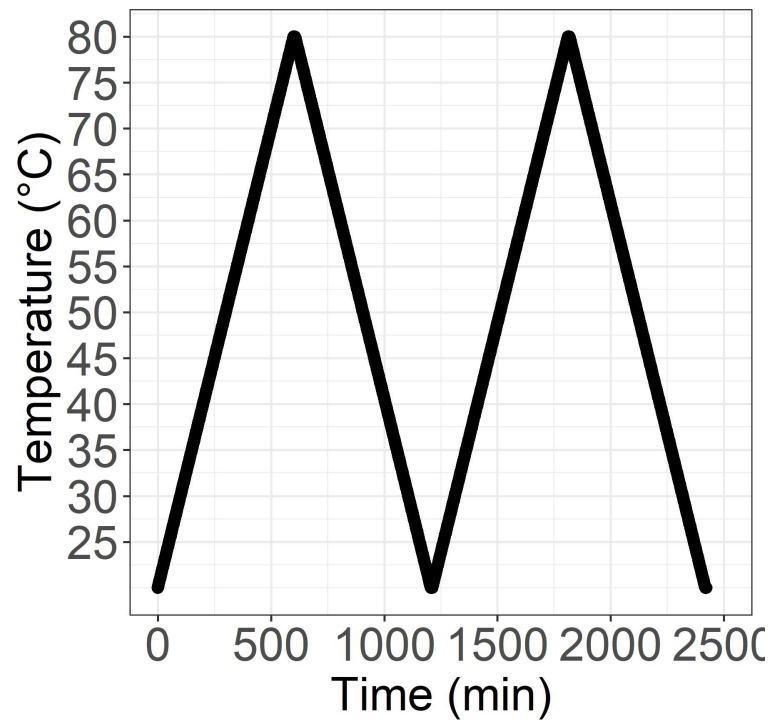

Supplement: d6ce00065g2.pdf [file d6ce00065g2.pdf]

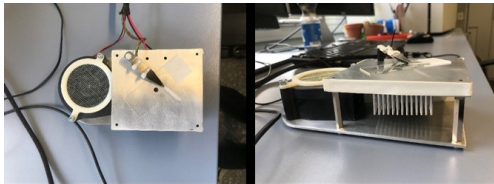

Supplement: d6ce00065g3.pdf [file d6ce00065g3.pdf]

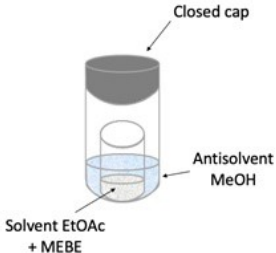

Supplement: d6ce00065g4.pdf [file d6ce00065g4.pdf]

Int. [A.U.]

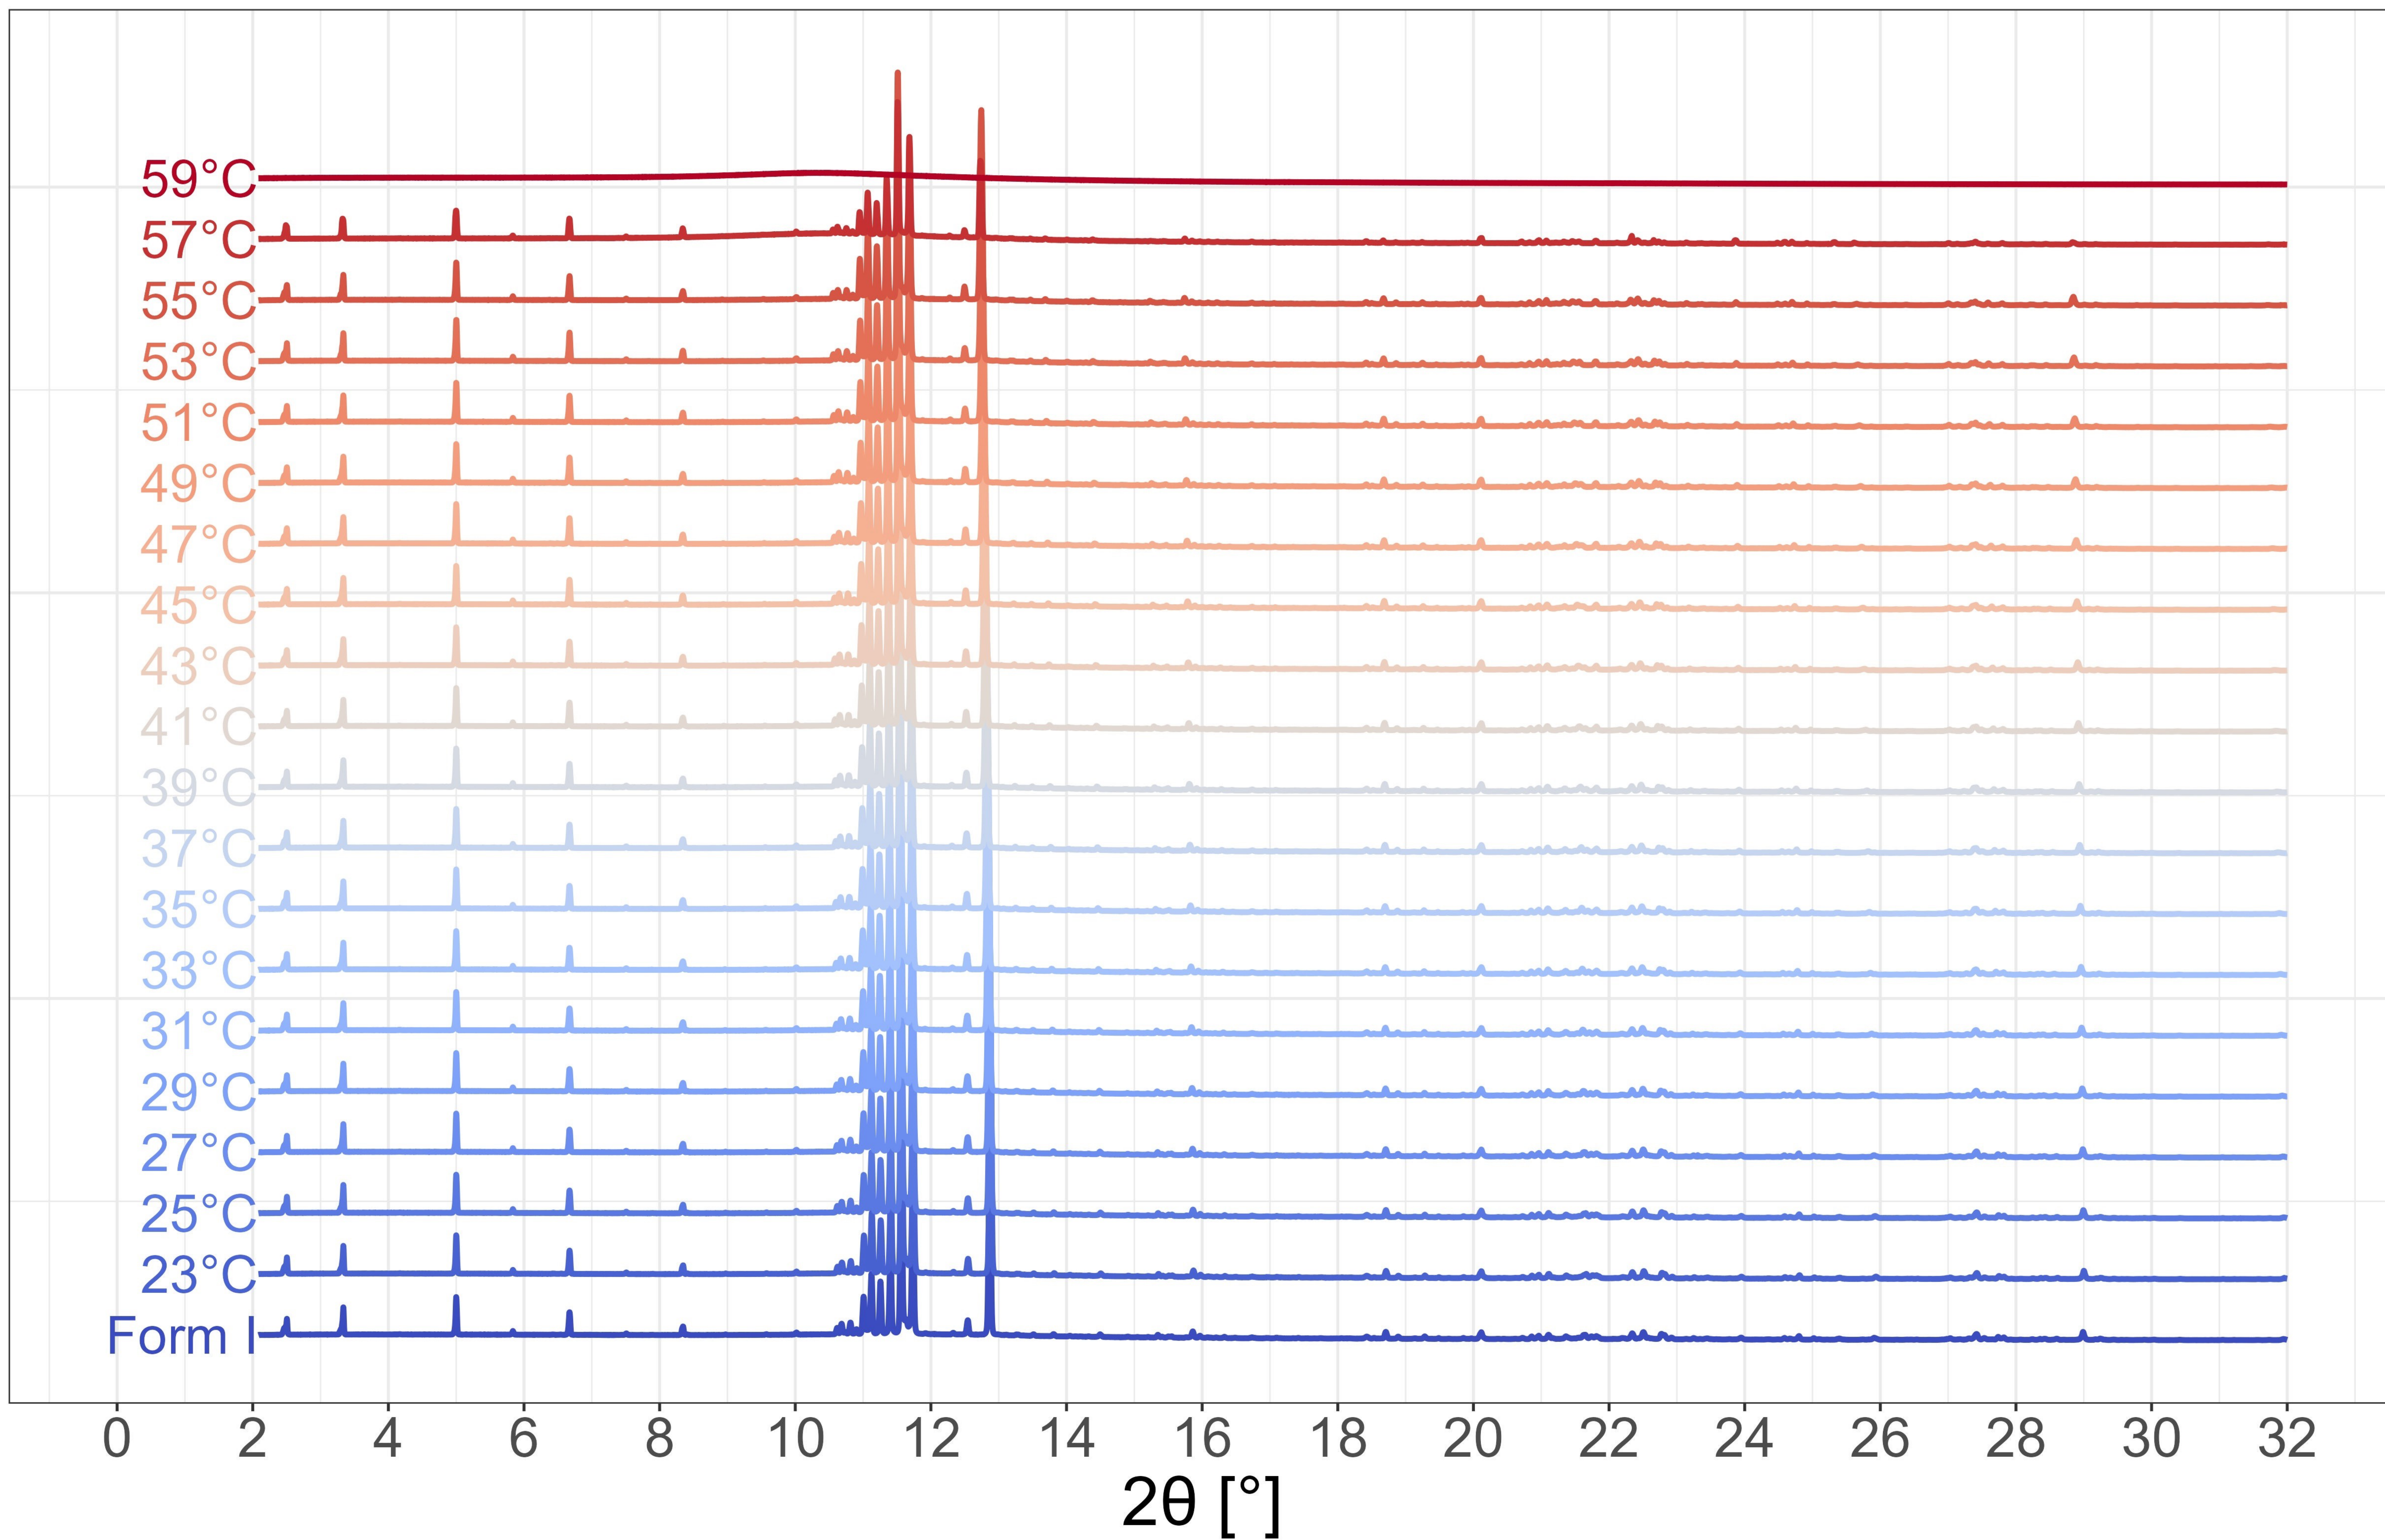

Supplement: d6ce00065g5.pdf [file d6ce00065g5.pdf]

Int. [A.U.]

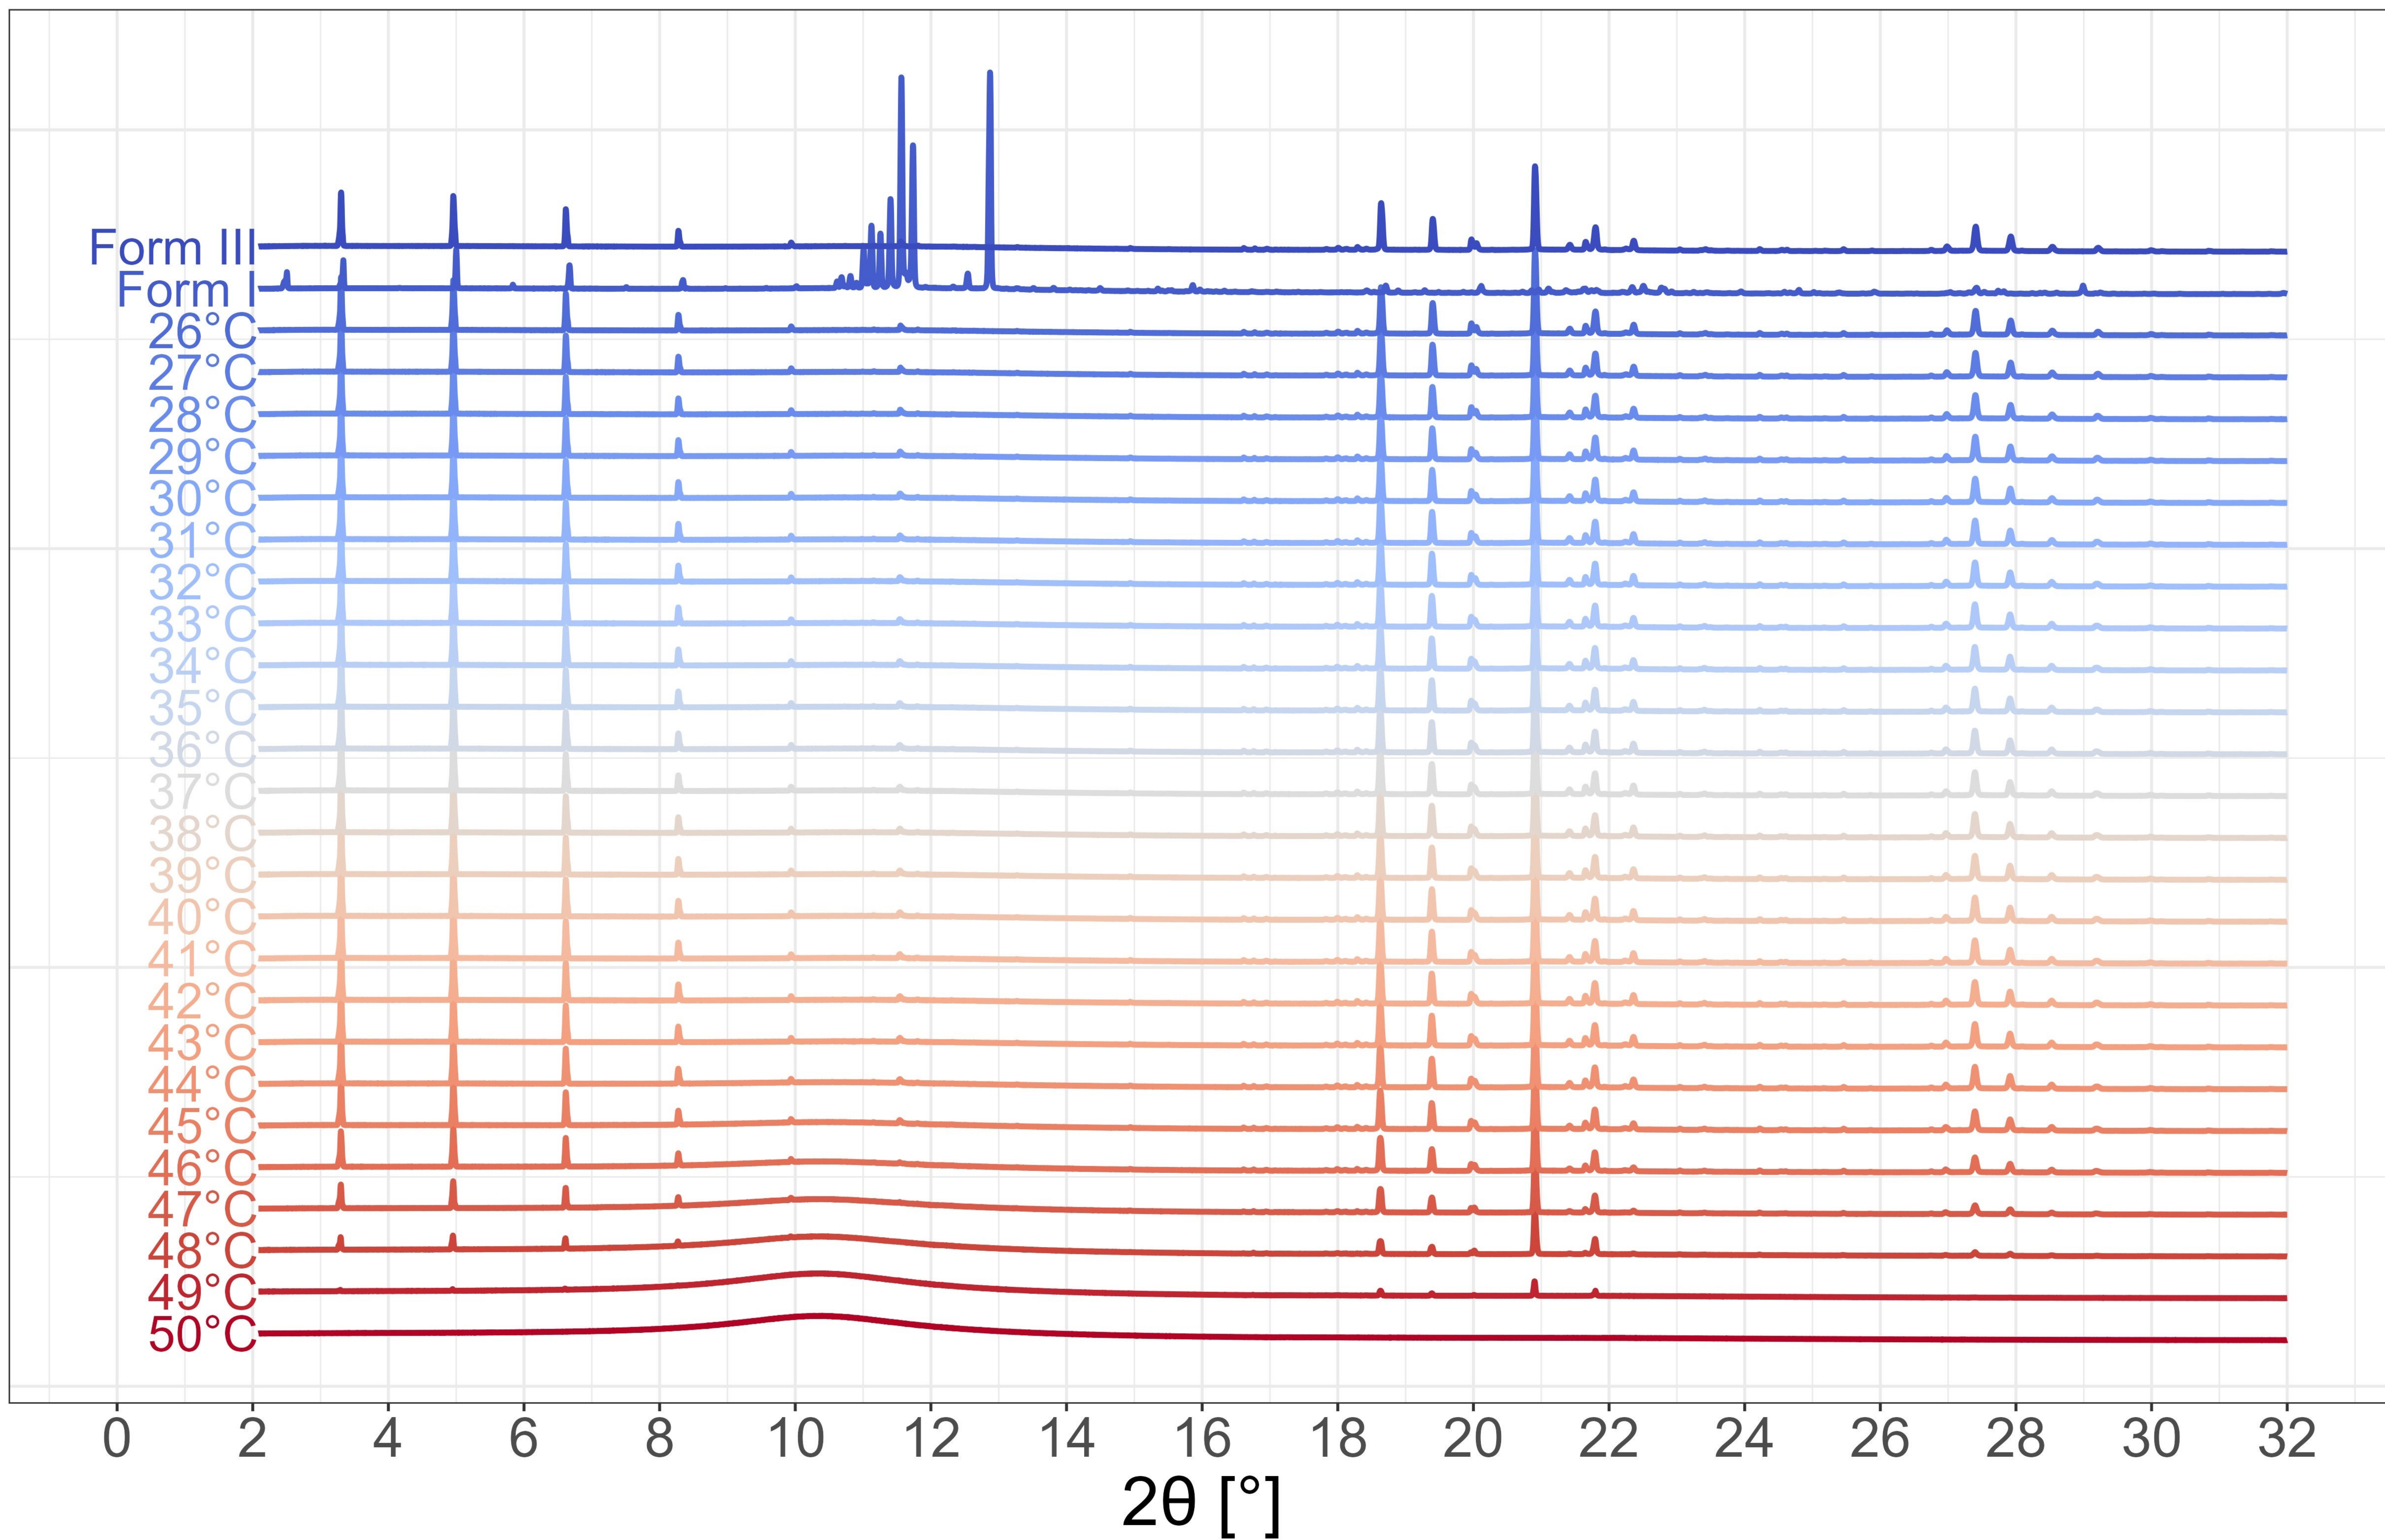

Supplement: d6ce00065g6.pdf [file d6ce00065g6.pdf]

Int. [A.U.]

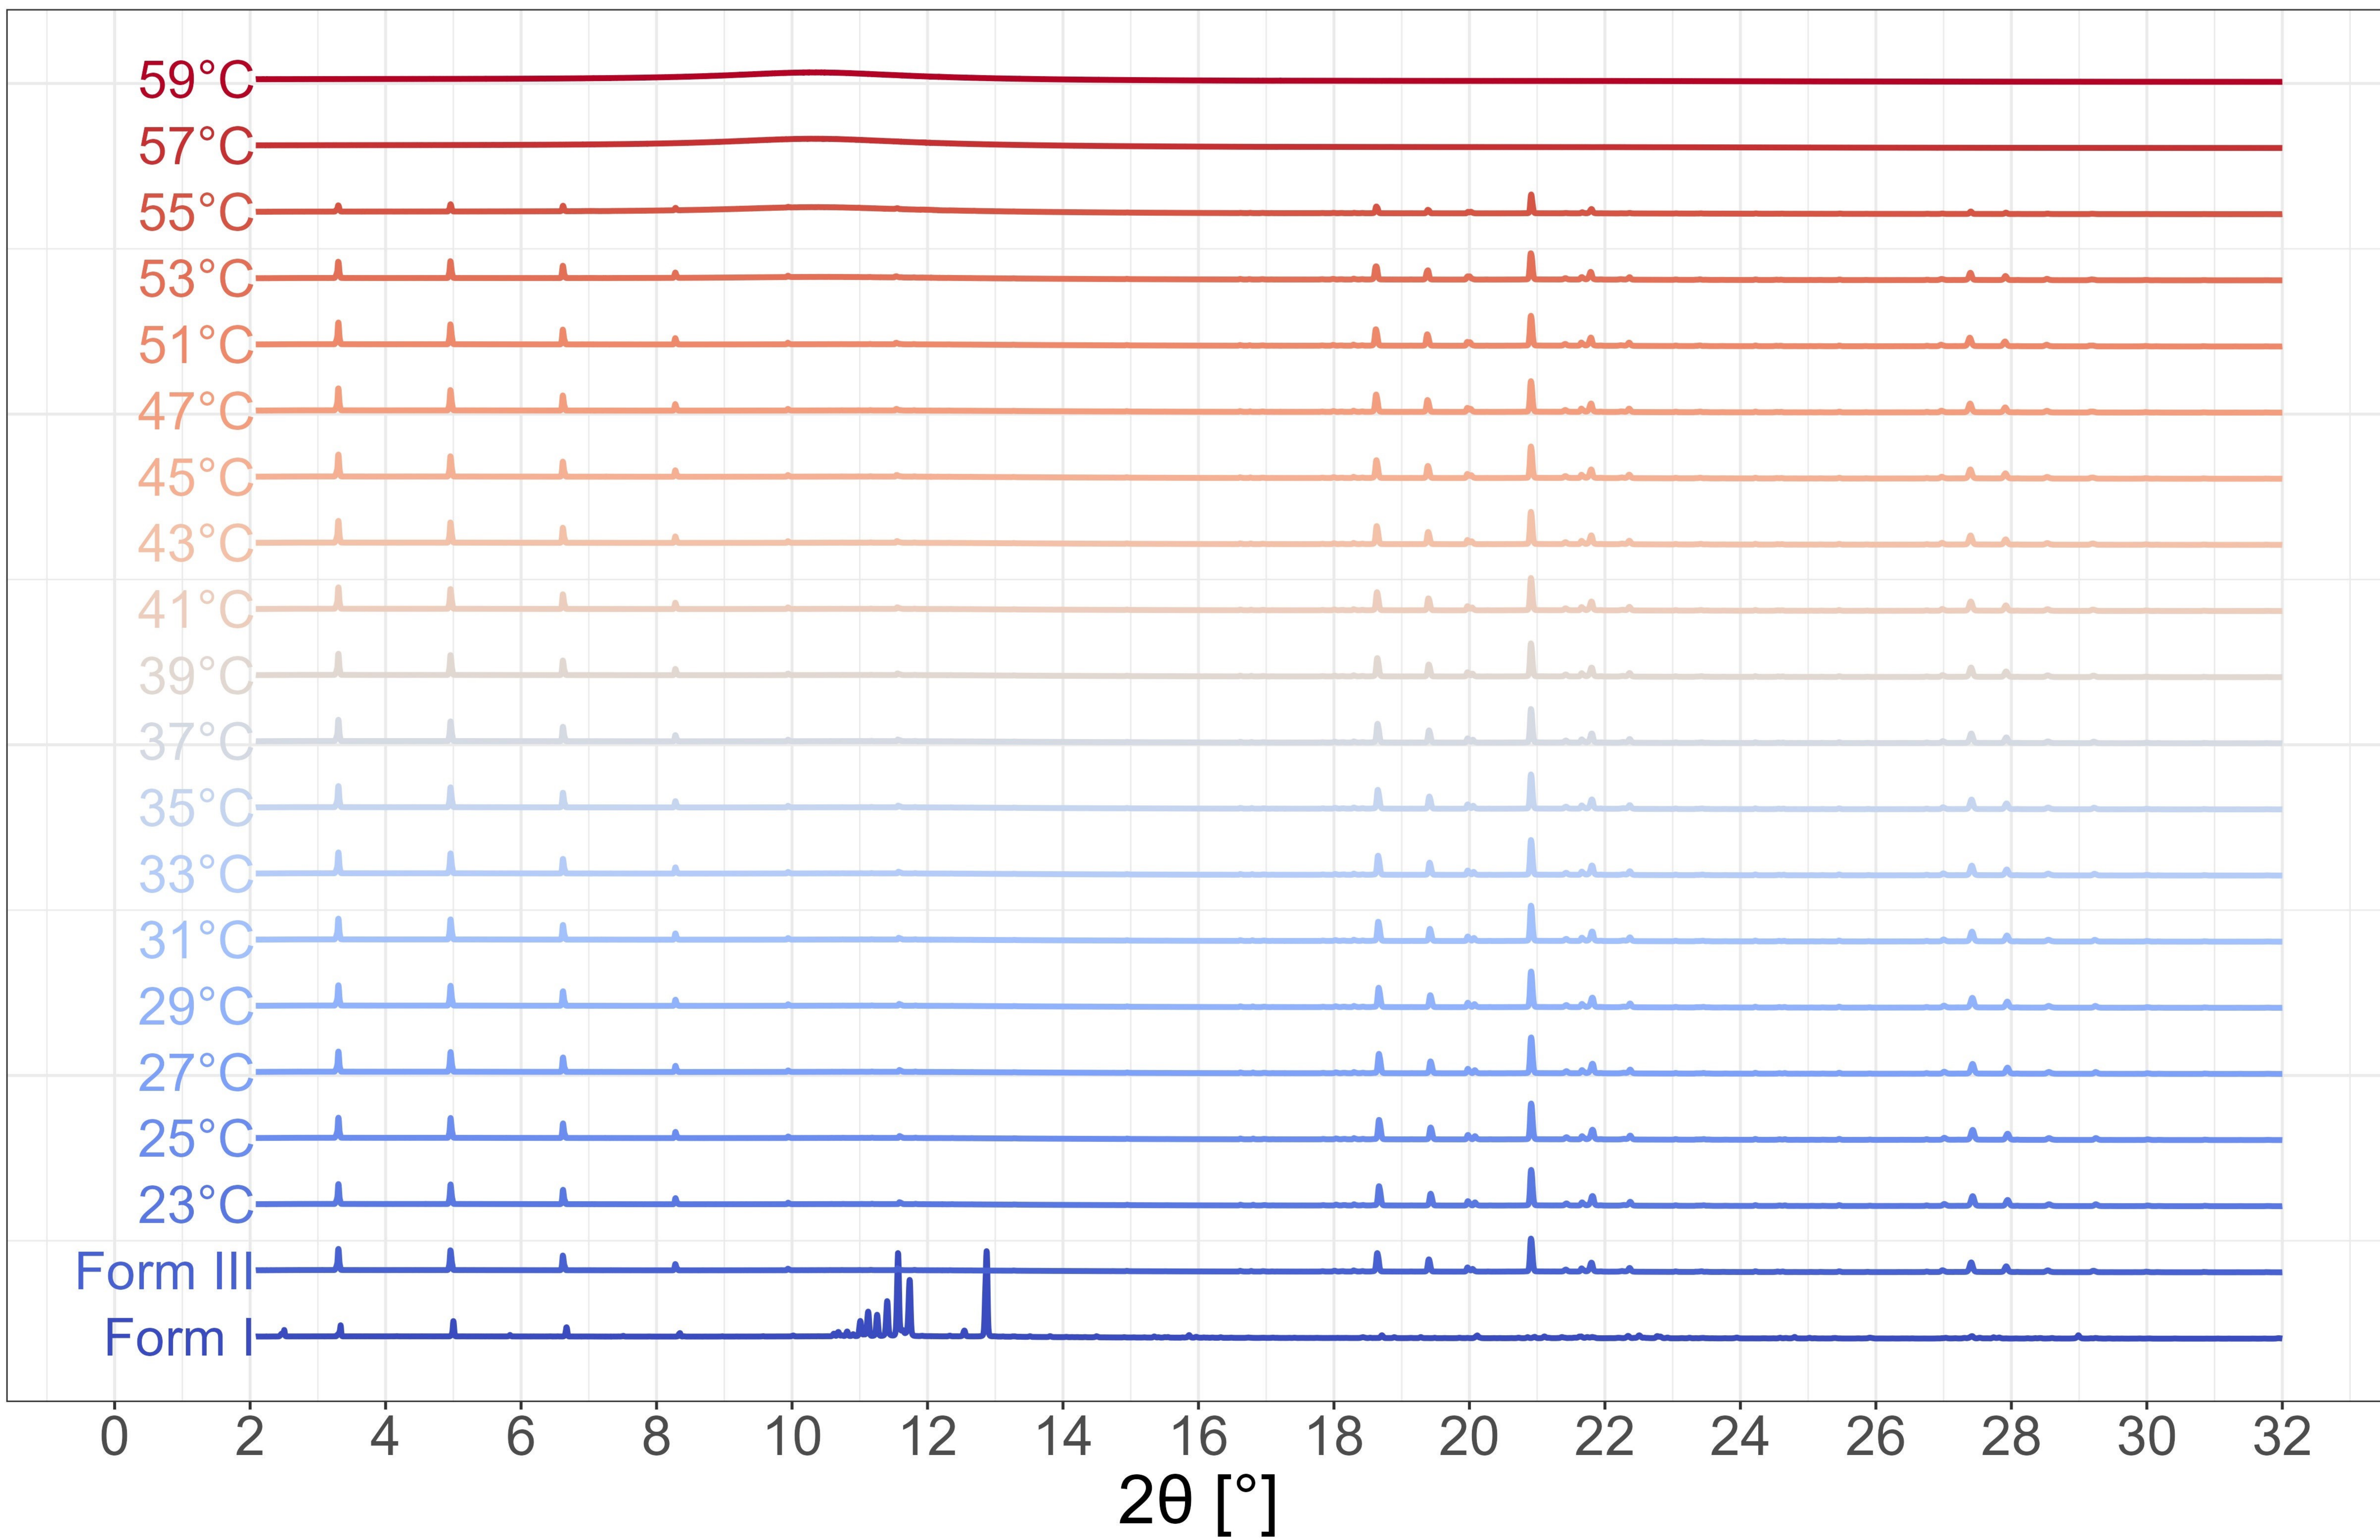

Supplement: d6ce00065g7.pdf [file d6ce00065g7.pdf]
